# Supplementary material for: Realisation and advanced engineering of true optical rugate filters based on nanoporous anodic alumina by sinusoidal pulse anodisation
Source: Royal Society of Chemistry journal article supplement (doi:10.1039/c5nr05462a), 2015-10-08
Supplement: c5nr05462a1.pdf [file c5nr05462a1.pdf]

# Supporting Information

## Realisation and Advanced Engineering of True Optical Rugate Filters Based on Nanoporous Anodic Alumina by Sinusoidal Pulse Anodisation

Abel Santos<sup>1,2\*</sup>, Jeong Ha Yoo<sup>1,2</sup>, Charu Vashisth Rohatgi<sup>1</sup>, Tushar, Kumeria<sup>1</sup>,  
Ye Wang<sup>1</sup> and Dusan Losic<sup>1,2\*</sup>

<sup>1</sup>School of Chemical Engineering, The University of Adelaide, Engineering North Building, 5005 Adelaide, Australia

<sup>2</sup>Institute for Photonics and Advanced Sensing (IPAS), The University of Adelaide, 5005 Adelaide, Australia

\*E-Mails: [abel.santos@adelaide.edu.au](mailto:abel.santos@adelaide.edu.au) ; [dusan.losic@adelaide.edu.au](mailto:dusan.losic@adelaide.edu.au)

## S1. Summary of Results

**Table S1** compiles a comprehensive summary of the experiments carried out in our study, where the effect of the main anodisation parameters on the position of the characteristic reflection peaks of NAA-RFs was systematically analysed. To this end, a NAA-RF produced with  $T_p = 650$  s,  $A_j = 0.420$  mA cm<sup>-2</sup>,  $J_{offset} = 0.28$  mA cm<sup>-2</sup>,  $N_p = 150$  pulses,  $T_{An} = -1^\circ\text{C}$  and  $t_{pw} = 0$  min was chosen as the reference structure. From this, the anodisation period ( $T_p$ ), the anodisation amplitude ( $A_j$ ), the anodisation offset ( $J_{offset}$ ), the number of pulses ( $N_p$ ), the anodisation temperature ( $T_{An}$ ) and the pore widening time ( $t_{pw}$ ) were systematically modified from 450 to 1400 s ( $\Delta T_p = 50$  s), from 0.105 to 0.735 mA cm<sup>-2</sup> ( $\Delta A_j = 0.105$  mA cm<sup>-2</sup>), from 0.14 to 0.98 mA cm<sup>-2</sup> ( $\Delta J_{offset} = 0.14$  mA cm<sup>-2</sup>), from 100 to 300 pulses ( $\Delta N_p = 50$  pulses), from -1 to 6°C ( $\Delta T_{An} = 1^\circ\text{C}$ ) and from 0 to 10 min ( $\Delta t_{pw} = 2$  min), respectively.

## S2. Refractive Index of Aqueous Solutions of Glucose

**Figure S1** shows a fitting line between the concentration of glucose and the refractive index of the solution. This relationship was used to establish a direct correlation between the level of change in  $\lambda_{peak}$  and the refractive index of the medium filling the nanopores of NAA-RFs.

## S3. Estimation of $\Delta\lambda_{peak}$ in Real-Time by RIFS

NAA-RFs were functionalised with HSA via APTES silanization using GTA as a coupling agent. The reversible binding affinity between HSA and indomethacin molecules was assessed by measuring changes in the position of the characteristic reflection peak (1<sup>st</sup> order) of NAA-RFs in real-time by RIFS. **Figure S2** shows representative RIFS spectra from which  $\Delta\lambda_{peak}$  associated with each stage of the sensing process was estimated.

**Realisation and Advanced Engineering of True Optical Rugate Filters Based on Nanoporous Anodic Alumina by Sinusoidal Pulse Anodisation**

**Table S1.** Comprehensive summary of the effect of the different anodisation parameters on the position of the characteristic reflection peaks of NAA-RFs analysed in this study.

| Analysed Parameter                 | Range and Step Size                                                                    | Peaks                 | Fitting Parameters                                                                                                                                  | Range of $\lambda_{Peak}$    |
|------------------------------------|----------------------------------------------------------------------------------------|-----------------------|-----------------------------------------------------------------------------------------------------------------------------------------------------|------------------------------|
| Anodisation Period - $T_p$         | From 450 to 1400 s<br>$\Delta T_p = 50$ s                                              | 1 <sup>st</sup> Order | $Slope = 0.67 \pm 0.01 \text{ nm s}^{-1}$<br>$Intercept = 130.21 \pm 13.95 \text{ nm}$<br>$R^2 = 0.9912$                                            | 401 – 1036 nm<br>(Red Shift) |
|                                    |                                                                                        | 2 <sup>nd</sup> Order | $Slope = 0.29 \pm 0.01 \text{ nm s}^{-1}$<br>$Intercept = 98.93 \pm 7.25 \text{ nm}$<br>$R^2 = 0.9899$                                              | 260 – 513 nm<br>(Red Shift)  |
|                                    |                                                                                        | 3 <sup>rd</sup> Order | $Slope = 0.16 \pm 0.02 \text{ nm s}^{-1}$<br>$Intercept = 109.11 \pm 26.41 \text{ nm}$<br>$R^2 = 0.8537$                                            | 278 – 347 nm<br>(Red Shift)  |
| Anodisation Amplitude - $A_j$      | From 0.105 to 0.735 mA cm <sup>-2</sup><br>$\Delta A_j = 0.105 \text{ mA cm}^{-2}$     | 1 <sup>st</sup> Order | $Slope = 970.74 \pm 28.13 \text{ nm (mA cm}^{-2}\text{)}^{-1}$<br>$Intercept = 166.22 \pm 13.21 \text{ nm}$<br>$R^2 = 0.9950$                       | 283 – 886 nm<br>(Red Shift)  |
|                                    |                                                                                        | 2 <sup>nd</sup> Order | $Slope = 464.60 \pm 47.99 \text{ nm (mA cm}^{-2}\text{)}^{-1}$<br>$Intercept = 98.03 \pm 28.28 \text{ nm}$<br>$R^2 = 0.9687$                        | 289 – 443 nm<br>(Red Shift)  |
| Anodisation Offset - $J_{Offset}$  | From 0.14 to 0.98 mA cm <sup>-2</sup><br>$\Delta J_{Offset} = 0.14 \text{ mA cm}^{-2}$ | 1 <sup>st</sup> Order | $Slope = 865.48 \pm 23.83 \text{ nm (mA cm}^{-2}\text{)}^{-1}$<br>$Intercept = 303.44 \pm 14.92 \text{ nm}$<br>$R^2 = 0.9955$                       | 431 – 1163 nm<br>(Red Shift) |
|                                    |                                                                                        | 2 <sup>nd</sup> Order | $Slope = 435.32 \pm 24.27 \text{ nm (mA cm}^{-2}\text{)}^{-1}$<br>$Intercept = 152.29 \pm 16.35 \text{ nm}$<br>$R^2 = 0.9847$                       | 290 – 587 nm<br>(Red Shift)  |
| Number of Pulses - $N_p$           | From 100 to 300 pulses<br>$\Delta N_p = 50$ pulses                                     | 1 <sup>st</sup> Order | $Slope = -0.97 \pm 0.11 \text{ nm pulse}^{-1}$<br>$Intercept = 715.37 \pm 17.27 \text{ nm}$<br>$R^2 = 0.9740$<br>NB: Fitting from 100 to 200 pulses | 623 – 525 nm<br>(Blue Shift) |
|                                    |                                                                                        | 2 <sup>nd</sup> Order | $Slope = -0.54 \pm 0.03 \text{ nm pulse}^{-1}$<br>$Intercept = 369.50 \pm 4.63 \text{ nm}$<br>$R^2 = 0.9939$<br>NB: Fitting from 100 to 200 pulses  | 318 – 263 nm<br>(Blue Shift) |
| Anodisation Temperature - $T_{An}$ | From -1 to 6°C<br>$\Delta T_{An} = 1^\circ\text{C}$                                    | 1 <sup>st</sup> Order | $Slope = -20.37 \pm 1.57 \text{ nm }^\circ\text{C}^{-1}$<br>$Intercept = 537.31 \pm 5.34 \text{ nm}$<br>$R^2 = 0.9597$                              | 562 – 421 nm<br>(Blue Shift) |
|                                    |                                                                                        | 2 <sup>nd</sup> Order | $Slope = -5.26 \pm 0.87 \text{ nm }^\circ\text{C}^{-1}$<br>$Intercept = 280.57 \pm 1.06 \text{ nm}$<br>$R^2 = 0.9229$                               | 286 – 270 nm<br>(Blue Shift) |
| Pore Widening Time - $t_{pw}$      | From 0 to 10 min<br>$\Delta t_{pw} = 2$ min                                            | 1 <sup>st</sup> Order | $Slope = -15.15 \pm 1.10 \text{ nm min}^{-1}$<br>$Intercept = 560.40 \pm 6.67 \text{ nm}$<br>$R^2 = 0.9741$                                         | 563 – 401 nm<br>(Blue Shift) |
|                                    |                                                                                        | 2 <sup>nd</sup> Order | $Slope = -10.06 \pm \text{NA nm min}^{-1}$<br>$Intercept = 287.32 \pm \text{NA nm}$<br>$R^2 = \text{NA}$<br>NB: Only two points                     | 286 – 266 nm<br>(Blue Shift) |

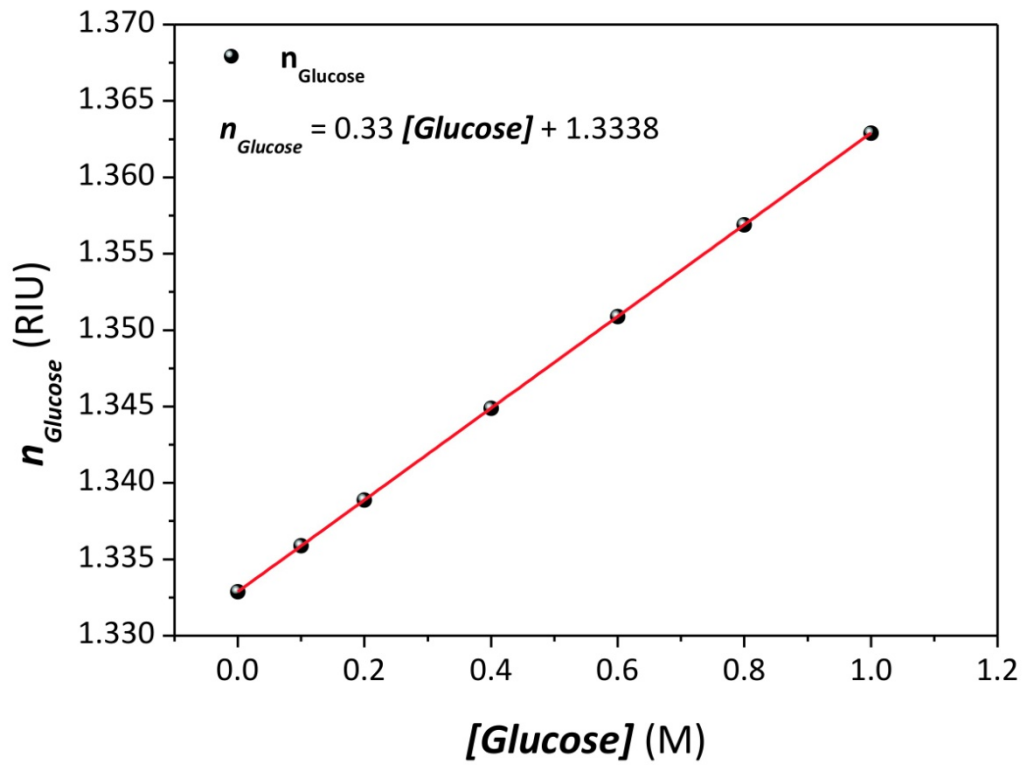

**Figure S1.** Estimation of the refractive index of aqueous solutions of glucose ( $n_{Glucose}$ ) as a function of their concentration ( $[Glucose]$ ).

Realisation and Advanced Engineering of True Optical Rugate Filters Based on Nanoporous Anodic Alumina by Sinusoidal Pulse Anodisation

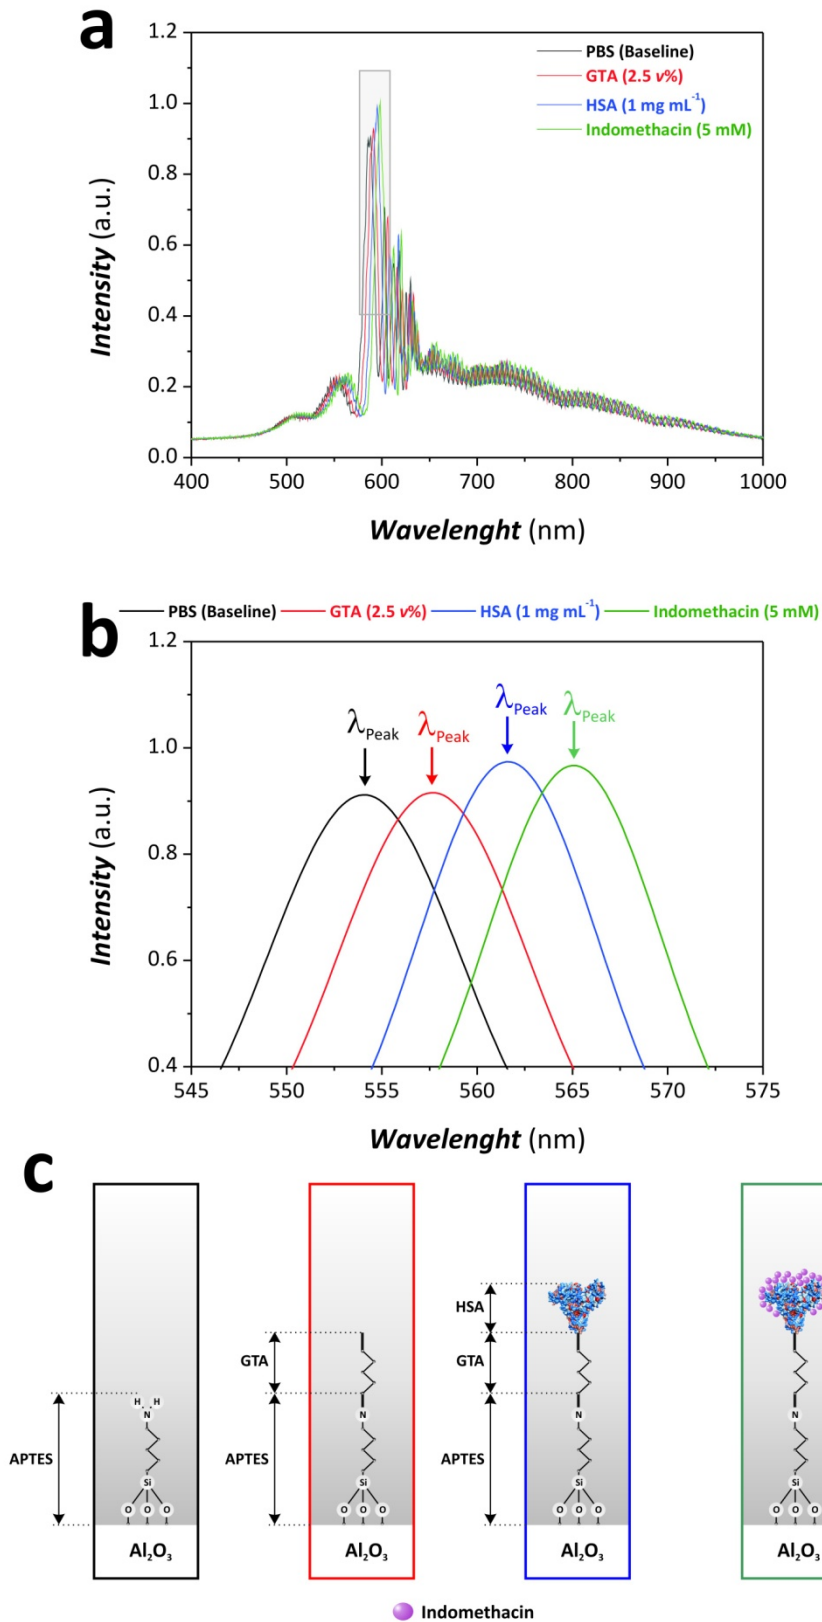

**Figure S2.** Example of estimation of changes in the characteristic reflection peak position ( $\lambda_{Peak}$ ) for the assessment of the interaction between HSA molecules and indomethacin by combining APTES-functionalised NAA-RFs and RfS. a) General RfS spectra of a NAA-RFs at each stage of the sensing process. b) Magnified view of the 1<sup>st</sup> order reflection peak shown in (b) (grey rectangle). c) Schematic illustration showing the different stages of the sensing process.
